# Supplementary material
Source: Elsevier journal article supplement (https://www.sciencedirect.com/science/article/pii/S2173572714000678)
Supplement: mmc1 [file S2173572714000678:mmc1.doc]

**Appendix I.**

**Sumary of most relevant bibliography.**

**Block 1. Mechanical Ventilation.**

**1.-Assessing alveolar pressure limit.**

The Acute Respiratory Distress Syndrome Network. Ventilation with lower tidal volumes as compared with traditional tidal volumes for acute lung injury and the acute respiratory distress syndrome. N Engl J Med. 2000; 342:1301-8.

The National Heart, Lung, and Blood Institute ARDS Clinical Trials Network. Higher versus lower end-expiratory pressures in patients with the acute respiratorydistress syndrome. N Engl J Med. 2004; 351:327-36.

**2.- Checking mechanical ventilation alarms.**

Esteban A, Anzueto A, Frutos F, [Alía I](http://www.ncbi.nlm.nih.gov/pubmed?term=Alía I%5BAuthor%5D&cauthor=true&cauthor_uid=11790214), [Brochard L](http://www.ncbi.nlm.nih.gov/pubmed?term=Brochard L%5BAuthor%5D&cauthor=true&cauthor_uid=11790214), [Stewart TE](http://www.ncbi.nlm.nih.gov/pubmed?term=Stewart TE%5BAuthor%5D&cauthor=true&cauthor_uid=11790214), et al. Characteristics and outcomes in adult patients receiving mechanical ventilation: a 28-day international study. JAMA. 2002; 287: 345-55.

Chambrin MC. Alarms in the intensive care unit: how can the number of false alarms be reduced. Crit Care. 2001; 5:184-188.

**3.- Assessing tolerance to spontaneous breathing.**

Esteban A, Alia I, Tobin MJ, [Gil A](http://www.ncbi.nlm.nih.gov/pubmed?term=Gil A%5BAuthor%5D&cauthor=true&cauthor_uid=9927366), [Gordo F](http://www.ncbi.nlm.nih.gov/pubmed?term=Gordo F%5BAuthor%5D&cauthor=true&cauthor_uid=9927366), [Vallverdú I](http://www.ncbi.nlm.nih.gov/pubmed?term=Vallverdú I%5BAuthor%5D&cauthor=true&cauthor_uid=9927366), et al. Effect of spontaneous breathing trial duration on outcome of attempts to discontinue mechanical ventilation. Am J Respir Crit Care. 1999; 159: 512-8.

Esteban A, Frutos F, Tobin MJ, [Alía I](http://www.ncbi.nlm.nih.gov/pubmed?term=Alía I%5BAuthor%5D&cauthor=true&cauthor_uid=7823995), [Solsona JF](http://www.ncbi.nlm.nih.gov/pubmed?term=Solsona JF%5BAuthor%5D&cauthor=true&cauthor_uid=7823995), [Valverdú I](http://www.ncbi.nlm.nih.gov/pubmed?term=Valverdú I%5BAuthor%5D&cauthor=true&cauthor_uid=7823995), et al. A comparison of four methods of weaning patients from mechanical ventilation. N Eng J Med. 1995; 332: 345-50.

Robertson TE, Sona C, Schallom L, [Buckles M](http://www.ncbi.nlm.nih.gov/pubmed?term=Buckles M%5BAuthor%5D&cauthor=true&cauthor_uid=18308220), [Cracchiolo L](http://www.ncbi.nlm.nih.gov/pubmed?term=Cracchiolo L%5BAuthor%5D&cauthor=true&cauthor_uid=18308220), [Schuerer D](http://www.ncbi.nlm.nih.gov/pubmed?term=Schuerer D%5BAuthor%5D&cauthor=true&cauthor_uid=18308220), et al. Improved extubation rates and earlier liberation from mechanical ventilation with implementation of a daily spontaneous-breathing trial protocol. J Am Coll Surg. 2008; 206:489-95.

**4.- Assessing adequate tidal volume.**

The Acute Respiratory Distress Syndrome Network. Ventilation with lower tidal volumes as compared with traditional tidal volumes for acute lung injury and the acute respiratory distress syndrome. N Engl J Med. 2000; 342:1301-8.

The National Heart, Lung, and Blood Institute ARDS Clinical Trials Network. Higher versus lower end-expiratory pressures in patients with the acute respiratorydistress syndrome. N Engl J Med. 2004; 351:327-36.

**Block 2. Haemodynamics.**

**5.- Checking monitor alarms.**

Chambrin MC. Alarms in the intensive care unit: how can the number of false alarms be reduced? Critical Care 2001; 5:184-8.

Siebig S, Kuhls S, Imhoff M, Gather U, Schölmerich J, Wrede CE. Intensive Care Unit alarms- how many do we need? Crit Care Med. 2010; 38:451-6.

Solsona JF, Altava C, Maull E, [Rodríguez L](http://www.ncbi.nlm.nih.gov/pubmed?term=Rodríguez L%5BAuthor%5D&cauthor=true&cauthor_uid=11489025), [Bosqué C](http://www.ncbi.nlm.nih.gov/pubmed?term=Bosqué C%5BAuthor%5D&cauthor=true&cauthor_uid=11489025), [Mulero A](http://www.ncbi.nlm.nih.gov/pubmed?term=Mulero A%5BAuthor%5D&cauthor=true&cauthor_uid=11489025). Are auditory warming in the intensive care unit properly adjusted? J Adv Nurs. 2001; 35: 402-6.

**6.- Assessing water balance & fluid adjustment.**

Sakr Y, Vincent JL, Reinhart K, [Groeneveld J](http://www.ncbi.nlm.nih.gov/pubmed?term=Groeneveld J%5BAuthor%5D&cauthor=true&cauthor_uid=16304249), [Michalopoulos A](http://www.ncbi.nlm.nih.gov/pubmed?term=Michalopoulos A%5BAuthor%5D&cauthor=true&cauthor_uid=16304249), [Sprung CL](http://www.ncbi.nlm.nih.gov/pubmed?term=Sprung CL%5BAuthor%5D&cauthor=true&cauthor_uid=16304249), et al. High tidal volume and positive fluid balance are associated with worse outcome in acute lung injury. Chest. 2005; 128: 3098-3108.

Bouchard J, Soroko S, Chertow GM, Himmelfarb J, Ikizler TA, Paganini EP, et al. Fluid accumulation, survival and recovery of kidney function in critically ill patients with acute kidney injury. Kidney International. 2009; 76: 422-27.

**7.- Appropriate haemodynamic monitoring.**

Alhashemi JA, Cecconi M, Hofer CK. Cardiac output monitoring: an integrative perspective. Critical Care. 2011; 15: 214.

García X, Mateu L, Maynar J, Mercadal J, Ochagavía a, Ferrándiz A. Estimating cardiac output. Utility in the clinical practice. Available invasive and non-invasive monitoring. Med Intensiva. 2011; 35: 552-61.

Antonelli M, Levy M, Andrews PJ, Chastre J, Hudson LD, Manthous C, et al. Hemodynamic monitoring in shock and implications for management. International Consensus Conference, Paris, France, 27-28 April 2006. Intensive Care Med. 2007; 33: 575-90

Dellinger RP, Levy MM, Carlet JM, Bion J, Parker MM, Jaeschke R, et al. Surviving Sepsis Compaign: International guidelines for management of severe sepsis and septic shock. Crit Care Med. 2008; 36: 296-327.

**8.- Fluid and amines adjustment according to monitoring.**

Pinsky MR. Hemodynamic evaluation and monitoring in the ICU. Chest. 2007; 132: 2020-9.

Sabatier C, Monge I, Maynar J, Ochagavía A. Assessment of cardiovascular preload and response to volumen expansión. Med Intensiva. 2012; 36: 45-55.

Marik PE, Monnet X, Teboul JL. Hemodynamic parameters to guide fluid therapy. Annals of Intensive Care. 2011; 21:1-9.

**Block 3. Renal function & CRRT.**

**9.- Acute renal failure assessment.**

López JA, Jorge S, Resina C. Prognostic utility of RIFLE for acute renal failure in patients with sepsis. Critical Care. 2007; 11:408.

Bellomo R, Kellum JA, Ronco C . Defining and classifying acute renal failure: from advocacy to consensus and validation of the RIFLE criteria. Intensive Care Med. 2007; 33: 409-13.

# Mehta RL, Kellum JA, Shah SV, Molitoris BA, Ronco C, Warnock D, et al. Acute Kidney Injury Network: report of an initiative to improve outcomes in acute kidney injury. Critical Care. 2007; 11:R31.

Herrera-Gutiérrez JF, Seller-Pérez G, Banderas-Bravo E, [Muñoz-Bono J](http://www.ncbi.nlm.nih.gov/pubmed?term=Muñoz-Bono J%5BAuthor%5D&cauthor=true&cauthor_uid=17609929), [Lebrón-Gallardo M](http://www.ncbi.nlm.nih.gov/pubmed?term=Lebrón-Gallardo M%5BAuthor%5D&cauthor=true&cauthor_uid=17609929), [Fernandez-Ortega JF](http://www.ncbi.nlm.nih.gov/pubmed?term=Fernandez-Ortega JF%5BAuthor%5D&cauthor=true&cauthor_uid=17609929). Replacement of 24-h creatinine clearance by 2-h creatinine clearance in intensive care unit patients: a single-center study. Intensive Care. 2007; 33:1900.

[Kuan Y](../../../../E:%5Cpubmed%3Fterm=%22Kuan%20Y%22%5BAuthor%5D), [Hossain M](../../../../E:%5Cpubmed%3Fterm=%22Hossain%20M%22%5BAuthor%5D), [Surman J](../../../../E:%5Cpubmed%3Fterm=%22Surman%20J%22%5BAuthor%5D), [El Nahas AM](../../../../E:%5Cpubmed%3Fterm=%22El%20Nahas%20AM%22%5BAuthor%5D), [Haylor J](../../../../E:%5Cpubmed%3Fterm=%22Haylor%20J%22%5BAuthor%5D). GFR prediction using the MDRD and Cockcroft and Gault equations in patients with end-stage renal disease. Nephrol Dial Trasplant. 2005; 20:2394-401.

Abefe SA, Abiola AF, Olubunmi AA, Adewale A. Utility of predicted creatinine clearance using MDRD formula compared with other predictive formulas in Nigerian patients. Saudi J Kidney Dis Transpl. 2009; 20:86-90.

**10.- Prescription of the treatment of CRRT.**

The VA/NIH Acute Renal Failure Trial Network. Intensity of renal support in critically ill patients with acute kidney injury. N Engl Med 2008; 359: 7-20.

Bagshaw SM, Berthiaume LR, Delaney A, Bellomo R. Continuous versus intermittent renal replacement therapy for critically ill patients with acute kidney injury: a meta-analysis. Crit Care Med. 2008 ; 36:610-7.

**11.- CRRT monitoring.**

Baldwin I. Factors affecting circuit patency and filter life. Contrib Nephrol. 2007; 156: 178-84.

Ghahramani N, Shadrou S, Hollenbeak C. A systematic review of continuous renal replacement therapy and intermittent haemodialysis in management of patients with acute renal failure. Nephrology. 2008 ;13:570-8.

**Block 4. Sedation/Analgesia.**

**12.-** **Evaluating the level of sedation and pain in sedated patients.**

Pronovost PJ, Berenholtz K, Ngo K, [McDowell M](http://www.ncbi.nlm.nih.gov/pubmed?term=McDowell M%5BAuthor%5D&cauthor=true&cauthor_uid=14595567), [Holzmueller C](http://www.ncbi.nlm.nih.gov/pubmed?term=Holzmueller C%5BAuthor%5D&cauthor=true&cauthor_uid=14595567), [Haraden C](http://www.ncbi.nlm.nih.gov/pubmed?term=Haraden C%5BAuthor%5D&cauthor=true&cauthor_uid=14595567), et al. Developing and pilot testing quality indicators in the intensive care unit. J Crit Care. 2003; 18:145-55.

Chamorro C, Martínez-Melgar R, Barrientos R; Analgesia and Sedation Work Group of SEMICYUC. Monitoring of sedation. Med Intensiva. 2008; 32 (Supl 1):45-52.

Sessler CN, Pedram S. Protocolized and target-based sedation and analgesia in the ICU. Crit Care Clin. 2009; 25:489-513.

**13.- Evaluating pain and analgesia in non-sedated patients.**

Pardo C, Muñoz T, Chamorro C; Analgesia and Sedation Work Group of SEMICYUC. Monitoring of pain. Med Intensiva. 2006; 30: 379-85.

**14.-** **Preventing oversedation.**

Mehta S, Burry L, Martinez-Motta JC, [Stewart TE](http://www.ncbi.nlm.nih.gov/pubmed?term=Stewart TE%5BAuthor%5D&cauthor=true&cauthor_uid=18552687), [Hallett D](http://www.ncbi.nlm.nih.gov/pubmed?term=Hallett D%5BAuthor%5D&cauthor=true&cauthor_uid=18552687), [McDonald E](http://www.ncbi.nlm.nih.gov/pubmed?term=McDonald E%5BAuthor%5D&cauthor=true&cauthor_uid=18552687), at al. A randomized trial of daily awakening in critically ill patients managed with a sedation protocol: a pilot trial. Crit Care Med. 2008; 36:2092-9.

Kress JP, Pohlman AS, O´Connor MF, [Hall JB](http://www.ncbi.nlm.nih.gov/pubmed?term=Hall JB%5BAuthor%5D&cauthor=true&cauthor_uid=10816184). Daily interruption of sedative infusion in critically ill patients undergoing mechanical ventilation. N Eng J Med. 2000; 342: 1471-7.

Estéban-Montiel MB, Alonso-Fernández MA, Sandiumenge A, [Jiménez-Martín MJ](http://www.ncbi.nlm.nih.gov/pubmed?term=Jiménez-Martín MJ%5BAuthor%5D&cauthor=true&cauthor_uid=18405535); Analgesia and Sedation Work Group of SEMICYUC. Prolonged sedation in Intensive Care Units. Med Intensiva. 2008; 32 (Supl 1):19-30.

**Block 5. Treatment (1).**

**15.-** **Checking allergies and intolerance to medication in the clinical history.**

[Reis AM](../../../../D:%5Cpubmed%3Fterm=%22Reis%20AM%22%5BAuthor%5D), [Cassiani SH](../../../../D:%5Cpubmed%3Fterm=%22Cassiani%20SH%22%5BAuthor%5D). Adverse drug events in an intensive care unit of a university hospital. Eur J Clin Pharmacol. 2011; 67:625-32.

**16.- Correctly prescribing the daily treatment orders.**

[Rajamani A](http://www.ncbi.nlm.nih.gov/pubmed?term=Rajamani A%5BAuthor%5D&cauthor=true&cauthor_uid=22129286), [Suen S](http://www.ncbi.nlm.nih.gov/pubmed?term=Suen S%5BAuthor%5D&cauthor=true&cauthor_uid=22129286), [Phillips D](http://www.ncbi.nlm.nih.gov/pubmed?term=Phillips D%5BAuthor%5D&cauthor=true&cauthor_uid=22129286), [Thomson M](http://www.ncbi.nlm.nih.gov/pubmed?term=Thomson M%5BAuthor%5D&cauthor=true&cauthor_uid=22129286). The SCRIPT project: a knowledge translation approach to improve prescription practice in a general intensive care unit. [Crit](http://www.ncbi.nlm.nih.gov/pubmed/22129286" \l "%23) Care Resusc. 2011;13:245-51.

**17.-** **Appropriate indication and dosage of prescribed treatment.**

Wilmer A, Louie K, Dodek P. Incidence of medication errors and adverse drug events in the ICU: a systematic review. Qual Saf Health Care. 2010; 19:1-9.

**18.-Prescribed treatment, correctly administered and transcription of verbal orders.**

Simpson SQ, Peterson DA, O´Brien-Ladner AR. Development and implementation of an ICU quality improvement checklist. AACN Advanced Critical Care. 2007; 18:183-9.

American Society Of Health-System Pharmacist (ASHP). Guidelines on preventing medication errors in hospitals. Am J Health-Syst Pharm. 1993; 50: 305-14.

Valentin A, Capuzzo M, Guidet B, [Moreno R](http://www.ncbi.nlm.nih.gov/pubmed?term=Moreno R%5BAuthor%5D&cauthor=true&cauthor_uid=19282436), [Metnitz B](http://www.ncbi.nlm.nih.gov/pubmed?term=Metnitz B%5BAuthor%5D&cauthor=true&cauthor_uid=19282436), [Bauer P](http://www.ncbi.nlm.nih.gov/pubmed?term=Bauer P%5BAuthor%5D&cauthor=true&cauthor_uid=19282436), et al. Research group on quality improvemet of the European Society of Intensive Care Medicine (ESICM); Sentinel Events Evaluation (SEE) Study Investigators. Errors in the administration of parenteral drugs-an urgent safety issue in intensive care units. Results from a multinational, prospective study. Br Med J. 2009; 338: b814.

# [Merino P](http://www.ncbi.nlm.nih.gov/pubmed?term=Merino P%5BAuthor%5D&cauthor=true&cauthor_uid=22190588), [Álvarez J](http://www.ncbi.nlm.nih.gov/pubmed?term=Álvarez J%5BAuthor%5D&cauthor=true&cauthor_uid=22190588), [Cruz Martín M](http://www.ncbi.nlm.nih.gov/pubmed?term=Cruz Martín M%5BAuthor%5D&cauthor=true&cauthor_uid=22190588), [Alonso Á](http://www.ncbi.nlm.nih.gov/pubmed?term=Alonso Á%5BAuthor%5D&cauthor=true&cauthor_uid=22190588), [Gutiérrez I](http://www.ncbi.nlm.nih.gov/pubmed?term=Gutiérrez I%5BAuthor%5D&cauthor=true&cauthor_uid=22190588); [SYREC Study Investigators](http://www.ncbi.nlm.nih.gov/pubmed?term=SYREC Study Investigators%5BCorporate Author%5D). Adverse events in Spanish intensive care units: the SYREC study. [Int J Qual Health Care](http://www.ncbi.nlm.nih.gov/pubmed/22190588" \l "%23). 2012; 24:105-13.

**Block 6. Treatment (2).**

**19.- Prevention of thromboembolic disease.**

Geerts WH, Pineo GF, Heit JA, [Bergqvist D](http://www.ncbi.nlm.nih.gov/pubmed?term=Bergqvist D%5BAuthor%5D&cauthor=true&cauthor_uid=15383478), [Lassen MR](http://www.ncbi.nlm.nih.gov/pubmed?term=Lassen MR%5BAuthor%5D&cauthor=true&cauthor_uid=15383478), [Colwell CW](http://www.ncbi.nlm.nih.gov/pubmed?term=Colwell CW%5BAuthor%5D&cauthor=true&cauthor_uid=15383478), et al. Prevention of venous thromboembolism; the Seventh ACCP Conference on Antithrombotic and Thrombolytic Therapy. Chest. 2004; 126: 338S-400S.

**20.- Prophylaxis of gastrointestinal bleeding.**

Cook DJ, Griffith LE, Walter SD, [Guyatt GH](http://www.ncbi.nlm.nih.gov/pubmed?term=Guyatt GH%5BAuthor%5D&cauthor=true&cauthor_uid=11737927), [Meade MO](http://www.ncbi.nlm.nih.gov/pubmed?term=Meade MO%5BAuthor%5D&cauthor=true&cauthor_uid=11737927), [Heyland DK](http://www.ncbi.nlm.nih.gov/pubmed?term=Heyland DK%5BAuthor%5D&cauthor=true&cauthor_uid=11737927), et al. The attributable mortality and length of intensive care unit stay of clinically important gastrointestinal bleeding in critically ill patients. Crit Care. 2001; 5: 368-75.

Krimsky WS, Mroz IB, Mcllwaine JK, [Surgenor SD](http://www.ncbi.nlm.nih.gov/pubmed?term=Surgenor SD%5BAuthor%5D&cauthor=true&cauthor_uid=19204137), [Christian D](http://www.ncbi.nlm.nih.gov/pubmed?term=Christian D%5BAuthor%5D&cauthor=true&cauthor_uid=19204137), [Corwin HL](http://www.ncbi.nlm.nih.gov/pubmed?term=Corwin HL%5BAuthor%5D&cauthor=true&cauthor_uid=19204137), et al. A model for increasing patient safety in the intensive care unit: increasing the implementation rates of proven safety measures. Qual Saf Health Care. 2009; 18:74-80.

Cook DJ, Fuller HD, Guyatt GH, [Marshall JC](http://www.ncbi.nlm.nih.gov/pubmed?term=Marshall JC%5BAuthor%5D&cauthor=true&cauthor_uid=8284001), [Leasa D](http://www.ncbi.nlm.nih.gov/pubmed?term=Leasa D%5BAuthor%5D&cauthor=true&cauthor_uid=8284001), [Hall R](http://www.ncbi.nlm.nih.gov/pubmed?term=Hall R%5BAuthor%5D&cauthor=true&cauthor_uid=8284001), et al. Risk factors for gastrointestinal bleeding in critically ill patients. Canadian Critical Care Trials Group. N Engl J Med. 1994; 330:377-381.

**21.- Control of hyperglycaemia.**

Preiser JC, Devos P, Ruiz-Santana S, [Mélot C](http://www.ncbi.nlm.nih.gov/pubmed?term=Mélot C%5BAuthor%5D&cauthor=true&cauthor_uid=19636533), [Annane D](http://www.ncbi.nlm.nih.gov/pubmed?term=Annane D%5BAuthor%5D&cauthor=true&cauthor_uid=19636533), [Groeneveld J](http://www.ncbi.nlm.nih.gov/pubmed?term=Groeneveld J%5BAuthor%5D&cauthor=true&cauthor_uid=19636533), et al. A prospective randomised multi-centre controlled trial on tight glucose control by intensive insulin therapy in adult intensive care units: the Glucontrol study. Intensive Care Med. 2009; 35:1738-48.

Finney SJ, Zekveld C, Elia A, [Evans TW](http://www.ncbi.nlm.nih.gov/pubmed?term=Evans TW%5BAuthor%5D&cauthor=true&cauthor_uid=14559958). Glucose control and mortality in critically ill patients. JAMA. 2003; 290: 2041-7.

Jacobi J, Bircher N, Krinsley J, Agus M, Braithwaite SS, Deutschman C, et al. [Guidelines for the use of an insulin infusion for the management of hyperglycemia in critically ill patients.](http://www.ncbi.nlm.nih.gov/pubmed/23164767) Crit Care Med. 2012; 40:3251-76.

**22.-** **Evaluation of antibiotic treatment.**

Dellinger RP, Levy MM, Rhodes A, Annane D, Gerlach H, Opal SM, et al. Surviving Sepsis Campaign: International guidelines for management of severe sepsis and septic shock: 2012. Intensive Care Med. 2013; 39:165-228.

Kumar A. Optimizing antimicrobial therapy in sepsis and septic shock. Crit Care Clin. 2009; 25:733-51.

Kumar A, Roberts D, Wood KE, [Light B](http://www.ncbi.nlm.nih.gov/pubmed?term=Light B%5BAuthor%5D&cauthor=true&cauthor_uid=16625125), [Parrillo JE](http://www.ncbi.nlm.nih.gov/pubmed?term=Parrillo JE%5BAuthor%5D&cauthor=true&cauthor_uid=16625125), [Sharma S](http://www.ncbi.nlm.nih.gov/pubmed?term=Sharma S%5BAuthor%5D&cauthor=true&cauthor_uid=16625125), et al. Duration of hypotension before initiation of effective antimicrobial therapy is the critical determinant of survival in human septic shock. Crit Care Med. 2006; 34:1589–96

Fish D. Optimal antimicrobial therapy for sepsis. [Am J Health Syst Pharm](http://www.ncbi.nlm.nih.gov/pubmed/11885408" \l "%23). 2002; 59: S13-S19.

**23.- Appropriate transfusion.**

Hébert PC, Wells G, Blajchman MA, [Marshall J](http://www.ncbi.nlm.nih.gov/pubmed?term=Marshall J%5BAuthor%5D&cauthor=true&cauthor_uid=9971864), [Martin C](http://www.ncbi.nlm.nih.gov/pubmed?term=Martin C%5BAuthor%5D&cauthor=true&cauthor_uid=9971864), [Pagliarello G](http://www.ncbi.nlm.nih.gov/pubmed?term=Pagliarello G%5BAuthor%5D&cauthor=true&cauthor_uid=9971864), et al. A multicenter, randomized, controlled clinical trial of transfusion requirements in critical care. Transfusion Requirements in Critical Care Investigators, Canadian Critical Care Trials Group. N Engl J Med. 1999; 340:409-417.

Leal Noval SR, Muñoz Gómez M, Campanario García A. Transfusion in the critical patient. Med Intensiva. 2004; 28:464-469.

**Block7. Techniques and tests.**

**24.- Checking of chest x-ray slides.**

Tolsma M, Kroner A, van den Hombergh CL, [Rosseel PM](http://www.ncbi.nlm.nih.gov/pubmed?term=Rosseel PM%5BAuthor%5D&cauthor=true&cauthor_uid=21048091), [Rijpstra TA](http://www.ncbi.nlm.nih.gov/pubmed?term=Rijpstra TA%5BAuthor%5D&cauthor=true&cauthor_uid=21048091), [Dijkstra HA](http://www.ncbi.nlm.nih.gov/pubmed?term=Dijkstra HA%5BAuthor%5D&cauthor=true&cauthor_uid=21048091), et al. The clinical value of routine chest radiographs in the first 24hours after cardiac surgery. Anesth Analg. 2011; 112:139-42.

Lorente L, Huidobro MS, Martin MM, Jiménez A, Mora ML. Accidental catheter removal in critically ill patients: a prospective and observational study. Critical Care. 2004; 8:229-33.

**25.- Daily evaluation of the need for catheters.**

O'Grady NP, Alexander M, Burns LA, [Dellinger EP](http://www.ncbi.nlm.nih.gov/pubmed?term=Dellinger EP%5BAuthor%5D&cauthor=true&cauthor_uid=21467014), [Garland J](http://www.ncbi.nlm.nih.gov/pubmed?term=Garland J%5BAuthor%5D&cauthor=true&cauthor_uid=21467014), [Heard SO](http://www.ncbi.nlm.nih.gov/pubmed?term=Heard SO%5BAuthor%5D&cauthor=true&cauthor_uid=21467014), et al. [Summary of recommendations: Guidelines for the Prevention of Intravascular Catheter-related Infections.](http://www.ncbi.nlm.nih.gov/pubmed/21467014) Clin Infect Dis. 2011; 52:1087-99.

Pronovost P, Needham D, Bernholtz S, [Sinopoli D](http://www.ncbi.nlm.nih.gov/pubmed?term=Sinopoli D%5BAuthor%5D&cauthor=true&cauthor_uid=17192537), [Chu H](http://www.ncbi.nlm.nih.gov/pubmed?term=Chu H%5BAuthor%5D&cauthor=true&cauthor_uid=17192537), [Cosgrove S](http://www.ncbi.nlm.nih.gov/pubmed?term=Cosgrove S%5BAuthor%5D&cauthor=true&cauthor_uid=17192537), et al. An intervention to decrease catheter related bloodstream infections in the ICU. N Engl J Med. 2006; 355:2725-32.

**Bloque 8. Nutrition.**

**26.-** **Enteral nutrition monitoring.**

Mesejo A, Vaquerizo C, Acosta J, Ortiz-Leyba C, Montejo JC; Spanish Society of Intensive Care Medicine and Coronary Units-Spanish Society of Parenteral and Enteral Nutrition (SEMICYUC-SENPE). Guidelines for specialized nutritional support in the critically-ill patient. Med Intensiva. 2011; 35:supl 1:1-6.

[McClave SA](http://www.ncbi.nlm.nih.gov/pubmed?term=McClave SA%5BAuthor%5D&cauthor=true&cauthor_uid=19398613), [Martindale RG](http://www.ncbi.nlm.nih.gov/pubmed?term=Martindale RG%5BAuthor%5D&cauthor=true&cauthor_uid=19398613), [Vanek VW](http://www.ncbi.nlm.nih.gov/pubmed?term=Vanek VW%5BAuthor%5D&cauthor=true&cauthor_uid=19398613), [McCarthy M](http://www.ncbi.nlm.nih.gov/pubmed?term=McCarthy M%5BAuthor%5D&cauthor=true&cauthor_uid=19398613), [Roberts P](http://www.ncbi.nlm.nih.gov/pubmed?term=Roberts P%5BAuthor%5D&cauthor=true&cauthor_uid=19398613), [Taylor B](http://www.ncbi.nlm.nih.gov/pubmed?term=Taylor B%5BAuthor%5D&cauthor=true&cauthor_uid=19398613), et al. Guidelines for the provision and assessment of nutrition support therapy in the adult critically ill patient: Society of Critical Care Medicine (SCCM) and American Society for Parenteral and Enteral Nutrition (ASPEN). J Parenter Enteral Nutr. 2009; 33:277-316.

**27.-** **Daily assessment by parenteral nutrition team.**

Singer P, Berger MM, Van den Berghe G, et al. ESPEN Guidelines on Parenteral Nutrition: intensive care. Clin Nutr. 2009; 28: 387-400.

**Block 9. Nursing Care.**

**28.- Checking endotracheal tube cuff pressure.**

Rello J, Sonora R, Jubert P, Artigas A, Rue M, Vallés J. Pneumonia in intubated patients: role of respiratory airway care. Am J Respir Crit Care Med. 1996; 154:111-115.

Niederman MS, Craven DE, Bonten MJ. American Thoracic Society and the Infectious Diseases Society of America Guidelines for the management of adults with hospital-acquired, ventilator-associated, and healthcare-associated pneumonia. Am J Respir Crit Care Med. 2005; 171:388-416.

**29.- Accomplishing bucal hygiene with clorhexidine (0.12%-0.2%).**

Carvajal C, Pobo A, Diaz E, [Lisboa T](http://www.ncbi.nlm.nih.gov/pubmed?term=Lisboa T%5BAuthor%5D&cauthor=true&cauthor_uid=20557902), [Llauradó M](http://www.ncbi.nlm.nih.gov/pubmed?term=Llauradó M%5BAuthor%5D&cauthor=true&cauthor_uid=20557902), [Rello J](http://www.ncbi.nlm.nih.gov/pubmed?term=Rello J%5BAuthor%5D&cauthor=true&cauthor_uid=20557902). Oral higiene with chlorhexidine on the prevention of ventilator-associated pneumonia in intubated patients: a systematic review of randomized clinical trials. Med Clin. 2010; 135:491-7.

# Morris AC, Hay AW, Swann DG, [Everingham K](http://www.ncbi.nlm.nih.gov/pubmed?term=Everingham K%5BAuthor%5D&cauthor=true&cauthor_uid=21666444), [McCulloch C](http://www.ncbi.nlm.nih.gov/pubmed?term=McCulloch C%5BAuthor%5D&cauthor=true&cauthor_uid=21666444), [McNulty J](http://www.ncbi.nlm.nih.gov/pubmed?term=McNulty J%5BAuthor%5D&cauthor=true&cauthor_uid=21666444), et al. Reducing ventilator-associated pneumonia in intensive care: Impact of implementing a care bundle. Crit Care Med. 2011; 39:2218-24.

# Chlebicki MP, Safdar N. [Topical chlorhexidine for prevention of ventilator-associated pneumonia: a meta-analysis.](http://www.ncbi.nlm.nih.gov/pubmed/17205028) Crit Care Med. 2007; 35:595-602.

# **30.-** **Daily evaluation of the risk of developing pressure ulcers.**

Chamorro J, Cerón E, García FP. Úlceras por presión. Nutrición Clínica en Medicina. 2008; 2: 65-84.

Guidelines for the pressure ulcer prevention and treatment. European Pressure Ulcer Advisory Panel & National Pressure Ulcer Advisory Panel 2009. [www.npuap.org](http://www.npuap.org/).

Anguera L, Colodrero E, García N, Mateo E, Roca A, Velasco MC. Education as a key piece in the prevention and good course of pressure ulcers. Enferm Intensiva. 2009; 20:19-26.

**31.- Daily evaluation of the protective measures necessary for the safe handling of the patient.**

Siegel JD, Jackson M, Chiarello L, the Healthcare Infection Control Practices Advisory Committee. Guideline for isolation precautions: preventing transmission of infectious agents in healthcare settings 2007; 1-219. Available in:

<http://www.cdc.gov/ncidod/dhgp/pdf/isolation2007.pdf>.

WHOWHO. Patient Safety. WHO guidelines on hand hygiene in health care. WHO 2009. Available in:

http://whqlibdoc.who.int/publications/2009/9789241597906_eng.pdf

**32.- Assessment semi-recumbent position.**

Coffin SE, Klompas M, Classen D, Coffin SE, Klompas M, Classen D, Arias KM, Podgorny K, Anderson DJ, et al. Strategies to Prevent Ventilator-Associated Pneumonia in Acute Care Hospitals. Infect Control Hosp Epidemiol. 2008; 29:S31–S40.

Alexiou VG, Ierodiakonou V, Dimopoulos G, Falagas ME. Impact of patient position on the incidence of ventilator-associated pneumonia: a meta-analysis of randomized controlled trials. J Crit Care.. 2009; 24:515-22

**Block 10. Structure.**

**33.- Correct identification of the patient .**

ICU. Standards and recommendations. 2010. Ministry of Health. Available in: <http://www.msc.es/organizacion/sns/planCalidadSNS/docs/UCI.pdf>.

**34.- Patients’ Clinical Information appropriately organised in their Clinical History.**

Krimsky WS, Mroz IB, Mcllwaine JK, [Surgenor SD](http://www.ncbi.nlm.nih.gov/pubmed?term=Surgenor SD%5BAuthor%5D&cauthor=true&cauthor_uid=19204137), [Christian D](http://www.ncbi.nlm.nih.gov/pubmed?term=Christian D%5BAuthor%5D&cauthor=true&cauthor_uid=19204137), [Corwin HL](http://www.ncbi.nlm.nih.gov/pubmed?term=Corwin HL%5BAuthor%5D&cauthor=true&cauthor_uid=19204137), et al. A model for increasing patient safety in the intensive care unit: increasing the implementation rates of proven safety measures. Qual Saf Health Care. 2009; 18:74-80.

Pronovost P, Berenholtz S, Dorman T, [Lipsett PA](http://www.ncbi.nlm.nih.gov/pubmed?term=Lipsett PA%5BAuthor%5D&cauthor=true&cauthor_uid=12800116), [Simmonds T](http://www.ncbi.nlm.nih.gov/pubmed?term=Simmonds T%5BAuthor%5D&cauthor=true&cauthor_uid=12800116), [Haraden C](http://www.ncbi.nlm.nih.gov/pubmed?term=Haraden C%5BAuthor%5D&cauthor=true&cauthor_uid=12800116). Improving communication in the ICU using daily goals. J Crit Care. 2003; 18:71-5.

**35.- Form stating limitation of life-support.**

Cabré L, Solsona JF. Limitation of therapeutic activity in intensive care medicine. Med Intensiva. 2002; 26:304-11.

Monzon JL, Saralegui I, Abizanda R, [Cabré L](http://www.elsevier.es/es/revistas/medicina-intensiva-64/recomendaciones-tratamiento-al-final-vida-paciente-critico-13117802-recomendaciones-semicyuc-2008" \l "8709fe86a7b9c0baa4c4f79c8ceb4b79%238709fe86a7b9c0baa4c4f79c8ceb4b79); [Iribarren S](http://www.elsevier.es/es/revistas/medicina-intensiva-64/recomendaciones-tratamiento-al-final-vida-paciente-critico-13117802-recomendaciones-semicyuc-2008" \l "0d88f5d2e94daf452527d675ac73156b%230d88f5d2e94daf452527d675ac73156b); [Martín MC](http://www.elsevier.es/es/revistas/medicina-intensiva-64/recomendaciones-tratamiento-al-final-vida-paciente-critico-13117802-recomendaciones-semicyuc-2008" \l "2873a0bb7933a09b289da1affc5cef7b%232873a0bb7933a09b289da1affc5cef7b), et al. For the SEMICYUC Working Group of Bioethics. Treatment recommendations at the end of the life of the critical patient. . Med Intensiva. 2008; 32:121-33.

Truog RD, Campbell ML, Curtis JR, Haas CE, Luce JM, Rubenfeld GD, et al. [Recommendations for end-of-life care in the intensive care unit: a consensus statement by the American College of Critical Care Medicine.](http://www.ncbi.nlm.nih.gov/pubmed/18431285) Crit Care Med. 2008; 36: 953-63

**36.- Assessing proper positioning of the rails.**

Goñi R, García MP, Vázquez M, [Margall MA](http://www.ncbi.nlm.nih.gov/pubmed?term=Margall Coscojuela MA%5BAuthor%5D&cauthor=true&cauthor_uid=15207188), [Asiaín MC](http://www.ncbi.nlm.nih.gov/pubmed?term=Asiaín Erro MC%5BAuthor%5D&cauthor=true&cauthor_uid=15207188). Assessing the quality of care in the ICU through a nursing care plan computerized. Enferm Intensiva. 2004; 15: 76-85.

Gray-Micelli D. Preventing falls in acute care. In: Capezuti E, Zwicker D, Mezey M, Fulmer T, editors. Evidence-based geriatric nursing protocols for best practice. 3rd ed. New York (NY): Springer Publishing Company; 2008. p. 161-98.

National Guideline Clearinghouse. Guideline of Use of restraints in the acute care setting. Available in: http://guideline.gov/content.aspx?id=12265.

**37.- Adequate information to families.**

Solsona JF, Cabré L, Abizanda R, Campos JM, Sainz A, Martín MC et al. Recomendations of the Bioethics Group of the Spanish Society of Intensive Care Medicine and Coronary Units regarding informed consent in the intensive care unit. Med Intensiva. 2002; 26:253-4.

Ciufo D, Hader R, Holly C. A comprehensive systematic review of visitation models in adult critical care units within the context of patient-and family-centred care. Int J Evid Based Healthc. 2011; 9:362-87.

**Appendix II.**

**Delphi method.**

The Delphi method is widely used in health sciences. This is a recognised method of determining the degree of consensus among experts on a given issue and can vary in its structure and development.

**Delphi survey, Iteration 1:** The initial list with the SMs proposed by the researchers was distributed by email to the experts, who were asked to analyse the variables within two weeks and were asked for their opinion of the importance and feasibility of each SM. Importance and feasibility of each item were rated using a 7-point scale, ranging from “not at all important” to “very important”, and “not at all feasible” to “very feasible”. Experts were also invited to comment on each item and to suggest other items that could be included in the questionnaire. An SM was excluded at each stage if its rating was polarised to the extremes of the scale (that is, if three or more experts gave a high rating of 6 or 7 while, on the other hand, three or more gave a low rating of 1 or 2). Furthermore, cumulative percentage scores were then used to determine which of the remaining SMs met the inclusion criteria, that is to say, at least 80% of the expert panel giving an importance rating of 5 or more and a feasibility rating of 4 or more. Experts’ comments were carefully considered and they had an opportunity later to request that any excluded item be reintroduced. At each round, experts were also asked to give qualitative feedback on the questions. Quantitative ratings and qualitative comments from the experts were then considered in order to revise any items for reappraisal in round 2.

**Delphi survey, iteration 2:** A second list, with the modifications resulting from the first round, was sent out to the experts and the process was repeated.

**Delphi survey, iteration 3:** A third list with the modifications resulting from the second round was sent out and the process was once again repeated. The final version of the list was then created with the information derived from this round.

**Appendix III.**

**Variables that have been subjected to a Delphi method and included in the final checklist: concept, inclusion criteria and evaluation method.**

**Concept**: refers to the meaning of each variable and the specific measurement based on the clinical characteristics of patients.

**Inclusion criteria:** allows the researcher to identify the patients who should be analyzed.

**Evaluation method:** describes how the evaluation must be carried out.

**BLOCK 1. MECHANICAL VENTILATION (MV).**

**1. Assessment alveolar pressure limit.**

**Concept**: the alveolar pressure value has been measured and appropriate measures have been taken to keep it below 30 cm H2O. Two clinical situations: 1) patients ARDS or without acute lung injury: the measurement is taken daily or whenever the clinical situation changes. 2) patients with ARDS and/or acute lung injury: the measurement should be taken, at least, once per shift. The results must be included in the worksheet.

**Inclusion criteria**: patients ventilated, sedated and adapted to the MV (controlled ventilatory mode).

**Evaluation method**: asking the attending physician and graphical display.

**2. Checking mechanical ventilation alarms.**

**Concept**: ventilator alarms have been prescribed in the daily treatment worksheet. These have been reviewed once per turn (nursing responsiblity) in the last 24 hours. Alarms to prescribe and review are: duration of apnea, peak pressure, minimum tidal volume (volume-controlled modes), minimum and maximum tidal volume (pressure-controlled ventilation modes), maximum and minimum respiratory rate. Alarms are programmed to detect: peak pressure> 50 cm H2O (30 in pressure ventilatory modes) and variations in tidal volume, respiratory rate and/or higher minute volume to 20-50% of the values prescribed.

**Inclusion criteria**: MV patients.

**Evaluation method**: reviewing the daily treatment and nursing worksheet.

**3. Assessment tolerance to spontaneous breathing.**

**Concept**: the possibility of a tolerance test to spontaneous ventilation has been considered. There are several options: T tube, pressure Support ≤ 7, CPAP ≤ 8.

**Inclusion criteria**: ventilated patients who meet the following criteria: alert, without anxiety or delirium, resolution of underlying disease, adequate oxygenation and pH. Adequate oxygenation: when FiO2 ≤ 0.4 and PEEP ≤ 8 for a pO2 greater than 60 mm Hg -or SaO2> 90%-. Adequate pH: if the volume minute required to normalize pH is less than 12 litres/min, temperature < 38 °C, haemodynamic stability, adequate respiratory muscle function with maximum inspiratory pressure ≥ 20.

**Evaluation method**: asking the attending physician.

**4. Assessment adequate tidal volume.**

**Concept**: mechanical ventilation has a tidal volume adjusted to weight. ARDS or acute lung injury patients: 6-8 ml/kg (considering the need to maintain plateau pressure <30). Other patients: 8 ml/kg.

**Inclusion criteria**: patients with controlled/assisted ventilation mode.

**Evaluation method**: asking the physician responsible or checking ventilator display.

**BLOCK 2. HAEMODYNAMICS.**

**5. Checking monitor alarms.**

**Concept**: monitor alarms prescribed in the daily treatment sheet are the responsibility of the attending physician. In addition, alarms have been reviewed once per turn and are reflected in the worksheet, which is the responsibility of the nursing staff. Alarms should be tailored to the clinical situation of each patient and must be correctly audible. Monitor alarms: arterial oxygen saturation by pulse oximetry, heart rate, blood pressure and respiratory rate (especially, in non-ventilated patients).

**Inclusion criteria**: all patients.

**Evaluation method**: asking the attending physician and nurse responsible and reviewing the nursing worksheet.

**6. Assessment of water balance and fluid adjustment.**

**Concept**: water balance (daily and cumulative from admission) has been evaluated and adjusted to clinical context. If possible, use the weight of the patient as an objective measure. As reference, the presence of a daily water balance > 1 litre or 3 litres of accumulated balance must be reevaluated.

**Inclusion criteria**: all patients.

**Evaluation method**: asking the attending physician or checking the worksheet.

**7. Appropriate haemodynamic monitoring.**

**Concept**: The criteria for increasing the complexity of haemodynamic monitoring have been evaluated based on the haemodynamic protocol of each ICU. If there is no specific protocol, consider the need to initiate or increase treatment with vasoactive drugs, any signs of tissue hypoperfusion such as oliguria, central venous saturation <70% for 6h or absence of clearance of lactate.

**6. Assessment of water balance and fluid adjustment.**

**Concept**: water balance (daily and cumulative from admission) has been evaluated and adjusted to clinical context. If possible, use the weight of the patient as an objective measure. As reference, the presence of a daily water balance > 1 litre or 3 litres of accumulated balance must be reevaluated.

**Inclusion criteria**: all patients.

**Evaluation method**: asking the attending physician.

**8. Fluid and amines adjustment according to the monitor.**

**Concept**: treatment, regarding fluid intake and sympathomimetic amines, has been adjusted for the parameters obtained in haemodynamic monitoring.

**Inclusion criteria**: patients in whom the level of monitoring was increased in the last 24 hours.

**Evaluation method**: asking the attending physician.

**BLOCK 3. RENAL FUNCTION AND CRRT.**

**9. Acute renal failure assessment.**

**Concept**: renal function has been evaluated and, if necessary, stratified. The assessment includes the analysis of the rate of diuresis and levels of urea and creatinine. Different methods can be used for stratification: AKIN, RIFLE, MDRD GFR or creatinine clearance.

**Inclusion criteria**: all patients.

**Evaluation method**: asking the attending physician.

**10.-Prescription of the treatment of CRRT.**

**Concept**: CRRT parameters have been prescribed according to the daily goals. Prescription includes dose (convection, diffusion), blood flow, fluid extraction, anticoagulation and, if necessary, electrolyte supply.

**Inclusion criteria**: patients with CRRT techniques.

**Evaluation method**: asking the attending physician and reviewing the specific treatment worksheet.

**11. CRRT monitoring.**

**Concept**: CRRT technique has been properly monitored in the last 24 hours. Adequate monitoring reflects the number of filters, duration of each filter, flow test, circuit pressures, downtime of CRRT and blood lost during the filter changes.

**Inclusion criteria**: CRRT patients.

**Evaluation method**: checking the CRRT monitoring worksheet.

**BLOCK 4. SEDATION/ANALGESIA.**

**12. Evaluating the level of sedation and pain in sedated patients.**

**Concept**: the nurse responsible has examined the level of sedation and pain according to a validated scale (eg, the Richmond Agitation-Sedation Scale and Campbell scale), every 4 hours, and has modified the dose of the sedative and analgesic medication according to this measurement and goals prescribed by the physician.

**Inclusion criteria**: mechanically ventilated patients with analgesic and sedative drugs.

**Evaluation method**: asking the nurse responsible and reviewing nursing worksheet.

**13. Evaluating pain and analgesia in non-sedated patients.**

**Concept**: the nurse responsible has assessed the pain sensation of the patient using a validated scale (eg, visual analog scale), every 4 hours (respecting sleep) and, when appropriate, has changed the dose or type of analgesic treatment . The result of the modification is evaluated 30 minutes later.

**Inclusion criteria**: patients with analgesia without sedation (conscious patient).

**Evaluation**: asking the nurse responsible and checking the worksheet.

**14. Prevention of over-sedation.**

**Concept**: appropriate measures to prevent the accumulation of sedatives have been considered. These measures could be: daily withdrawal of sedation, sequential sedation or other measures considered in the specific local protocol. Exclusion criteria: intracranial hypertension, status epilepticus, limitation of life-sustaining treatment and other special clinical situations where is necessary to maintain deep sedation.

**Inclusion criteria**: patients with deep level of sedation (RASS -4, -5).

**Evaluation method**: asking the attending physician and checking the worksheet.

**BLOCK 5. TREATMENT (1).**

**15. Checking allergies and intolerance to medication in the clinical history.Alpha**

**Concept**: allergies and intolerance to medication have been recorded in the clinical history and have been noted in the medical record visibly. Furthermore, drugs reactions, intolerance or other adverse events associated with the administration of medication are recorded daily. Medication errors are excluded.

**Inclusion criteria**: all patients.

**Evaluation method**: asking the attending physician and reviewing medical records and worksheet.

**16. Correct prescription of the daily treatment orders.**

**Concept**: prescription is correct, i.e. full name of the patient and record number, box number, date and time of prescription, physician responsible (name/signature), drug name, route of administration, frequency of administration, non-pharmacological measures, evaluation of possible changes in the effectiveness of the drug whether the route of administration is the nasogastric tube and checking the fluid to dilute intravenous drugs.

**Inclusion criteria**: all patients.

**Evaluation method**: reviewing the treatment sheet with the attending physician.

**17. Appropriate indication and dosage of prescribed medicine.**

**Concept**: the prescribed medication is appropiate for the clinical condition of the patient. The indication and dosing are based on the unit’s specific protocol or according to national or international guidelines. Regarding dosage, adjustments must be made based on patients age, renal and hepatic function.

**Inclusion criteria**: all patients.

**Evaluation method**: reviewing of the patient's diagnosis and prescribed treatment.

**18. Prescribed treatment, correctly administered and transcription of verbal instructions.**

**Concept**: before updating the daily treatment, it must be checked that medication administered corresponds to treatment orders in the worksheet. If a medication is not administered, the cause must be noted. With respect to verbal orders, it must be noted on the treatment sheet later (indicating the time).

**Inclusion criteria**: all patients.

**Evaluation method**: checking the worksheet and the treatment sheet.

**BLOCK 6. TREATMENT (2).**

**19. Prevention of thromboembolic disease.**

**Concept**: prophylaxis of deep vein thrombosis was carried out in the previous 24 hours. Prophylaxis can be with unfractionated heparin, low molecular weight heparin, [fondaparinux](http://www.uptodate.com/contents/fondaparinux-drug-information?source=see_link) or pneumatic compression systems of the lower extremities.

**Inclusion criteria**: patients with no exclusion criteria for the administration of heparin and length of stay ≥ 24hours.

**Evaluation method**: checking the treatment sheet.

**20. Prophylaxis of gastrointestinal bleeding.**

**Concept**: prophylaxis of gastrointestinal bleeding has been carried out in the previous 24 hours. Pharmacological agents: H2 blockers, proton pump inhibitors or sucralfate.
 **Inclusion criteria**: stress ulcer prophylaxis for ICU patients is recommended with any of the following characteristics: coagulopathy, mechanical ventilation for more than 48 hours, history of GI ulceration or bleeding with the past year, and two or more minor risk factors. Minor risk factors included sepsis, ICU admission lasting >1 week, occult GI bleeding lasting ≥6 days, and glucocorticoid therapy.

**Evaluation method**: checking the treatment sheet.

**21. Control of hyperglycaemia.**

**Concept**: a blood glucose control has been carried according to the protocol of the service. If there is no specific protocol, capillary glucose determination should be considered every 6hrs (or other period depending on the type of diet and insulin administered). In general, a blood glucose target of 140 to 180 mg/dL is recommended. Schedule will be checked of insulin administration after detecting two consecutive determinations of glucose > 180 mg/dL or <80 mg/dl, in the last 24 hours.

**Inclusion criteria**: patients on mechanical ventilation, postoperative patients, severe sepsis/ septic shock patients with multiorgan failure and traumatic patients. Stable patients with long length stay may be excluded, daily blood glucose control or urinary dipstick determination of glucose.
 **Evaluation method**: daily worksheet observation and treatment sheet.

**22. Evaluation of antibiotic treatment.**

**Concept**: antibiotic treatment has been evaluated at several points: 1) Early administration (identification of infection focus and antibiotic administration within 1 hour), 2) Re-evaluation of whether empirical treatment is adequate, 3) Checking antibiotics according to microbiological results, 4) Checking antibiotic dose (according to renal and hepatic function or presence of dialysis techniques/CRRT), 5) Evaluation of the duration of antibiotic treatment. The adequacy of empirical treatment refers to whether or not the antibiotic is adapted to a local specific protocol and/or national or international guidelines.

**Inclusion criteria**: all patients with antibiotic treatment, including prophylactic antibiotic.

**Evaluation method**: asking the attending physician and, if appropriate, review of microbiology results.

**23. Appropriate transfusion.**

**Concept**: transfusion requirements according to local protocol have been evaluated. General recommendation: non-transfused patients with pre-transfusion levels of haemoglobin> 7 mg/dl. Exclusion criteria: massive bleeding, acute coronary syndrome, severe sepsis/septic shock during resuscitation phase, severe hypoxemia, patients with brain injury, organ donor and pregnancy.

**Inclusion criteria**: all patients.

**Evaluation method**: asking the attending physician and, if appropriate, checking analytical results.

**BLOCK 7. TECHNIQUES AND TESTS.**

**24. Checking of chest x-ray slides.**

**Concept**: the chest radiograph has been checked for the endotracheal tube position or tracheostomy tube, nasogastric tube, central venous catheters and other intrathoracic devices as Sawn-Ganz catheter, pleural drainage tubes or intraaortic ballon pump.

**Inclusion criteria**: all patients requiring chest radiograph.

**Evaluation method**: asking the attending physician.

**25. Daily evaluation of the need for catheters.**

**Concept**: Checking the possibility of removing central venous catheter, arterial catheter, peripheral venous catheters, urinary catheter and / or chest drains has been considered.

**Inclusion criteria**: all patients with those devices.

**Evaluation method**: asking the attending physician.

**BLOCK 8. NUTRITION.**

**26. Enteral nutrition monitoring.**

**Concept**: enteral nutrition has been monitored according to the specific protocol. The protocol should consider early enteral nutrition (initiated within 48 hours), dose (assessing the relationship between administered kcal/kcal prescribed), tolerance, gastrointestinal complications (abdominal distension, vomiting, regurgitation, diarrhoea/ constipation) and weekly analytical monitoring.

**Inclusion criteria**: all patients with enteral nutrition.

**Evaluation method**: asking the attending physician.

**27. Daily assessment by parenteral nutrition team.**

**Concept**: the indication, volume, infusion rate and admixture's exact composition has been discussed with the parenteral nutrition team and tailored to the nutritional and fluid needs of each patient.

**Inclusion criteria**: all patients with parenteral nutrition.

**Evaluation method**: asking the attending physician.

**BLOCK 9. NURSING CARE.**

**28. Checking endotracheal tube cuff pressure.**

**Concept**: checking that endotracheal tube cuff pressure (nasotracheal or tracheostomy tube) is between 20 and 30 cm H2O. It should be checked once per shift or whenever the tube is manipulated.

**Inclusion criteria**: all patients with invasive mechanical ventilation or without mechanical ventilation but with canula of tracheostomy (endotrcheal cuff).

**Evaluation method**: asking the nurse responsible.

**29. Accomplishing bucal hygiene with clorhexidine (0.12%-0.2%).**

**Concept**: oral hygiene with chlorhexidine has been carried out once per shift. Bucal hygiene should be carried out after securing the position of the tube and after checking the correct tube cuff pressure.

**Inclusion criteria**: all patients with an artificial airway.

**Evaluation method**: asking the nurse responsible.

**30. Daily evaluation of the risk of developing pressure ulcers.**

**Concept**: daily evaluation of the risk of developing pressure ulcers using a validated scale (eg, the Braden scale) has been carried out by the nurses and action has been taken based on this evaluation. The result of the evaluation must be recorded in the worksheet.

**Inclusion criteria**: all patients.

**Evaluation method**: asking the nurse responsible and checking worksheet.

**31. Daily evaluation of the protective measures needed for the safe handling of the patient.**

**Concept**: protective measures appropriate to the recommendations (material for hand hygiene included) and the proper disposal of this material has been reviewed by nurses/ nursing assistant personal. Isolated patients must visibly indicate the cause of isolation.

**Inclusion criteria**: all patients.

**Evaluation method**: asking the nurse /nursing assistant responsible or visual check box environment.

**32. Assessment semi-recumbent position.**

**Concept**: the degree of inclination of the head of the patient has been evaluated. Recommended inclination is 30-45°. The evaluation is carried out on each nursing shift and should be recorded in the worksheet.

**Inclusion criteria**: all patients on mechanical ventilation unless it is contraindicated, for example: patients sufering spinal injury.

**Evaluation method**: direct visualization.

**BLOCK 10. STRUCTURE.**

**33. Correct identification of the patient.**

**Concept**: correct patient identification (tag or bracelet) has been checked from the patient’s tag or bracelet, validated by the Centre, where, at least, two identifiers are noted.

**Inclusion criteria**: all patients.

**Evaluation method**: direct visualization.

**34. Checking patients’ clinical information appropriately organised in their Clinical History.**

**Concept**: checking whether the most relevant dates are included in Clinical History. Relevant dates are: comorbidities, personal history of allergies, current clinical process, results of additional tests, data from the daily evolution, list of current problems and revised results of microbiology.

**Inclusion criteria**: all patients.

**Evaluation method**: reviewing of the Clinical History.

**35. Form stating limitation of life-support.**

**Concept**: There must be a document in the Cinical History stating limitation of life-support and it has been checked. This document should be updated every day. Revocation and/or change in level of limitation of life-support is possible and must be stated clearly in the Clinical History.

**Inclusion criteria**: patients with some type of limitation on the life-sustaining treatment.

**Evaluation method**: asking the attending physician and, if appropriate, revision of the Clinical History.

**36. Assessment proper positioning of the rails.**

**Concept**: proper positioning of the rails has been checked.

**Inclusion criteria**: all patients.

**Evaluation method**: direct visualization.

**37. Adequate information to families.**

**Concept**: contact with the family has been established. The contact person for giving information has been identified and daily meetings are being held with the family (the nurse must be present). Also, consent forms for the techniques or procedures established by each service have been signed.

**Inclusion criteria**: all patients.

**Evaluation method**: asking the attending physician.
